# Supplementary material for: Mononuclear TiN complexes formed by the facile multiple deprotonation of H3N·B(C6F5)3: the importance of chloride ligands
Source: Royal Society of Chemistry journal article supplement (doi:10.1039/b812785a), 2008-01-01
Supplement: b812785a.pdf [file b812785a.pdf]

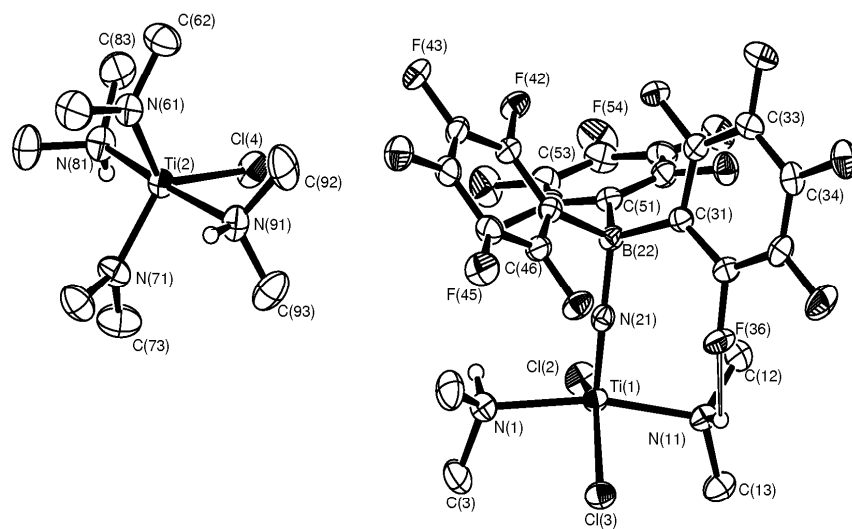

Figure S1, depicting both the anion and cation of **3** and their relative orientations, displacement ellipsoids are drawn at the 50% probability level.
